# Supplementary material for: CKD-581 Downregulates Wnt/β-Catenin Pathway by DACT3 Induction in Hematologic Malignancy
Source: PubMed Central journal article supplement — Biomol Ther (Seoul). 2022 Jul 4;30(5):435–46. doi: 10.4062/biomolther.2022.022 (PMC9424334; doi:10.4062/biomolther.2022.022), 2022-07-04
Supplement: bt-30-5-435-supple.pdf [file bt-30-5-435-supple.pdf]

**A**

| Cell type | Regulation | Genes (> 4-folded change)                                                                                                                    |
|-----------|------------|----------------------------------------------------------------------------------------------------------------------------------------------|
| HH        | Up         | C14orf145, C16orf93, DACT3, MXD1, NEU1, RAB40B, SUPT4H1, TPMT, WDR19                                                                         |
|           | Down       | CABLES1, CHRNA6, CMTM8, FANK1, GPR114, IKZF1, IL27RA, KLF2, PLD5, PRKCDBP, PSCD4, PTPN3, RINL, TNFRSF8, TRAF3IP3, UBE2Q2, VSTM2L, ZAK, ZMIZ1 |
| MJ        | Up         | DACT3                                                                                                                                        |
|           | Down       | -                                                                                                                                            |

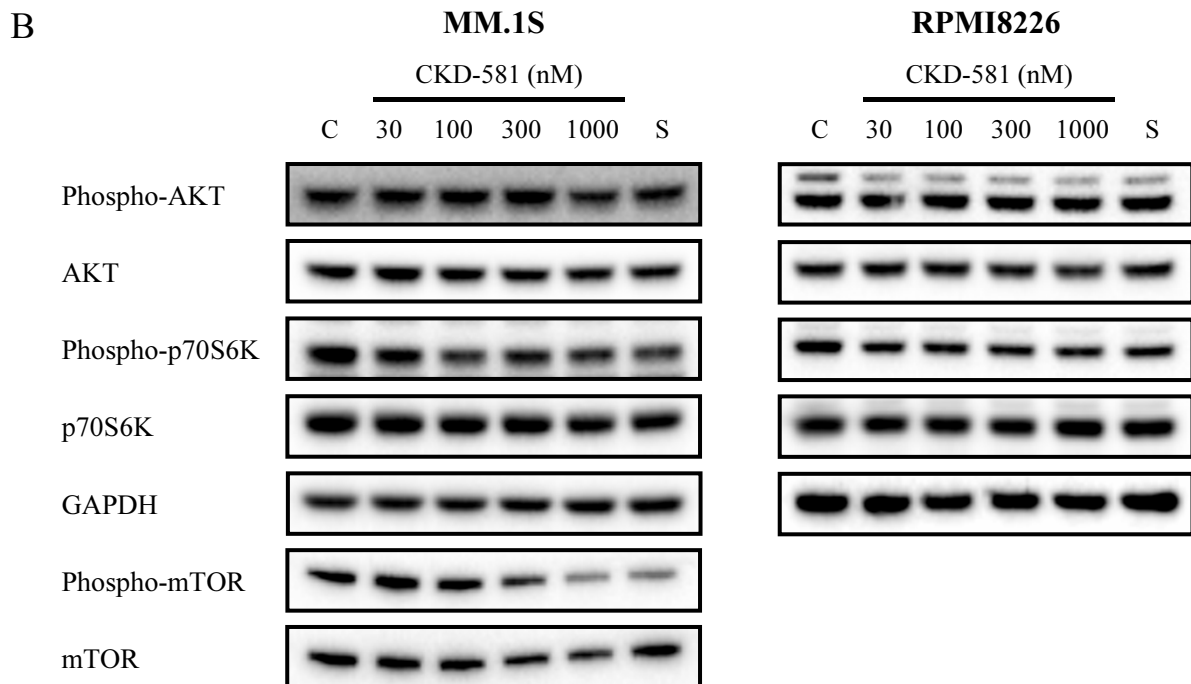

(A) Summarized results of cDNA microarray results in HH and MJ cells treated with CKD-581.  
 (B) Effects of CKD-581 on Akt/mTOR pathway. Immunoblottings for Akt/mTOR pathway were performed in MM.1S and RPMI8226 cells treated with vehicle or CKD-581.
